# Supplementary material for: Ganoderic acid A from Ganoderma lucidum protects against alcoholic liver injury through ameliorating the lipid metabolism and modulating the intestinal microbial composition
Source: Royal Society of Chemistry journal article supplement (doi:10.1039/d1fo03219d), 2022-01-01
Supplement: d1fo03219d2.xlsx [file d1fo03219d2.xlsx]

## Sheet: Sheet1
Supplementary Materials-3:
The relative abundance of significantly different metabolites between the Model and GAA-H groups by UPLC-QTOF/MS in ESI+ mode [data calibrated by peak area of internal standard]
Metabolite ID	MS2 name	GAA-H_1	GAA-H_2	GAA-H_3	GAA-H_4	GAA-H_5	GAA-H_6	GAA-H_7	GAA-H_8	Model_1	Model_2	Model_3	Model_4	Model_5	Model_6	Model_7	Model_8	Model_9	Model_10
POS_472	Betaine aldehyde	22.5718	20.9681	25.4635	19.9842	17.2254	29.9812	16.7374	19.0353	11.8228	11.6103	20.9032	8.45619	13.443	10.8318	8.45309	13.0483	14.3686	26.1933
POS_523	3-Aminobutanoic acid	0.493673	0.348554	0.46769	0.418055	0.48376	0.537567	0.345085	0.447302	0.341482	0.352641	0.473474	0.356648	0.22736	0.275032	0.263097	0.329098	0.332281	0.342541
POS_868	3-Aminobenzoic acid	1.07002	1.20088	1.52585	0.912614	1.26408	1.6822	1.30264	1.54231	0.863514	0.826749	1.09445	0.707213	0.455594	0.756349	0.560386	0.827726	0.91704	1.70703
POS_878	Tyramine	1.31406	1.12574	1.36358	1.20101	1.97451	1.70721	0.818984	1.28757	0.862786	0.828041	1.14396	0.703497	0.687501	0.851312	0.788127	1.08623	0.8814	1.03578
POS_1509	Acetoacetic acid	1.30569	1.57666	1.14047	1.56271	1.6137	1.48468	1.20926	1.11215	1.10332	0.796757	1.26095	0.874507	0.991752	0.723609	0.712609	0.753273	1.27853	1.04459
POS_1651	N-formylanthranilic acid	0.137908	0.0660249	0.0941325	0.059636	0.0471235	0.086662	0.110658	0.155371	0.0391166	0.0363721	0.0554821	0.0580637	0.0554339	0.0402933	0.0561422	0.0754903	0.0700687	0.036268
POS_2049	DL-Homoserine	0.769269	0.875226	0.754859	0.872995	0.884911	0.852094	0.647479	0.66379	0.662356	0.508163	0.705051	0.499447	0.596304	0.40895	0.434598	0.425836	0.732057	0.554257
POS_2116	myo-Inositol	0.17107	0.249291	0.183474	0.0927104	0.128552	0.16456	0.103402	0.111342	0.220422	0.30954	0.371761	0.317962	0.341569	0.316197	0.285865	0.330676	0.369207	0.159528
POS_2332	2-Hydroxyphenylacetic acid	0.03635	0.0275926	0.0379645	0.0394621	0.00925702	0.0104285	0.0450317	0.0505789	0.0568897	0.0575948	0.0794647	0.12977	0.0605535	0.108878	0.0684536	0.103459	0.063368	0.0267924
POS_2712	Alpha-D-Glucose	0.222688	0.338201	0.151864	0.150906	0.161094	0.174247	0.118428	0.0659406	0.185893	0.31605	0.509956	0.248573	0.29875	0.290696	0.341404	0.363138	0.546302	0.127236
POS_2908	Hydroxyacetone	0.17089	0.166526	0.143488	0.057094	0.122242	0.141698	0.167582	0.136636	0.0713858	0.071093	0.0922483	0.0585685	0.0589798	0.0426217	0.0507974	0.0380377	0.0790474	0.0585385
POS_3024	Phenylpropionylglycine	0.211066	0.10766	0.105501	0.0593016	0.0911783	0.106202	0.10687	0.118682	0.0564902	0.0682886	0.0391677	0.0549714	0.0390258	0.0513735	0.106648	0.0629795	0.0699254	0.120998
POS_3227	2-Phenylacetamide	1.25732	1.12952	1.53442	1.57967	1.53994	1.76581	1.03837	1.64094	0.804426	0.844361	1.41722	1.12383	0.731068	0.711083	0.784426	1.17239	0.918875	1.28266
POS_3421	Carbaryl	0.738236	0.769401	0.804479	0.775864	0.668363	0.736593	0.513221	0.764273	0.67731	0.490233	0.661714	0.51903	0.430956	0.525469	0.439987	0.602338	0.609332	0.656155
POS_3423	3-Methoxy-4-hydroxyphenylethyleneglycol	1.70685	2.01542	2.46455	1.64844	1.37597	2.77489	1.7388	2.15461	1.14138	0.92917	1.74735	1.09138	0.916045	1.18646	0.847066	1.88017	1.3105	2.10517
POS_3459	1-Aminocyclopropanecarboxylic acid	0.107097	0.117965	0.175979	0.141163	0.103709	0.147708	0.072497	0.126635	0.0711553	0.0469459	0.0599454	0.0442431	0.0347267	0.0148181	0.0634159	0.051245	0.0604378	0.0538933
POS_3469	Ala-Leu	2.70651	5.992	14.1781	2.91862	3.622	16.7465	1.36798	6.42211	0.530812	0.909937	4.2104	0.499634	0.945196	0.789506	0.734855	0.946496	1.16866	5.40607
POS_3620	Ser-Thr	0.0530889	0.0794718	0.0797239	0.0829646	0.04841	0.062361	0.027026	0.0653858	0.0480907	0.0425862	0.0509332	0.0253114	0.0204267	0.0232117	0.036153	0.0394585	0.0375783	0.0376947
POS_3772	(S)-(-)-Citronellic acid	0.438565	0.40155	0.477039	0.377697	0.394598	0.369414	0.467189	0.350835	0.592454	0.438749	0.4794	0.487637	0.559989	0.78213	0.482289	0.587553	0.698197	0.878608
POS_4026	Nicotinyl	0.105402	0.156088	0.190403	0.156298	0.112911	0.385181	0.117894	0.193353	0.0523289	0.0609298	0.133461	0.0363223	0.0448034	0.0496338	0.032779	0.0631335	0.0504912	0.309195
POS_4065	Pantothenate	5.65732	6.60991	8.63077	7.43389	5.78935	8.6661	4.4974	7.77168	2.35587	2.73622	4.58458	2.80146	3.47058	3.27155	2.66696	7.06625	4.65023	6.44106
POS_4106	Thr-Thr	0.190765	0.272831	0.312574	0.245475	0.217222	0.274885	0.135215	0.239669	0.13165	0.101577	0.164604	0.0989266	0.0906858	0.0296883	0.114399	0.134006	0.162659	0.11245
POS_4210	Dulcitol	1.0355	0.73467	1.39459	0.966197	1.05133	0.916576	0.860039	1.1358	0.7185	0.574188	0.515371	0.590688	0.273417	0.692945	0.258097	0.559084	0.841979	1.34207
POS_4225	D-Mannose-6-phosphate	0.246751	0.281452	0.285815	0.259646	0.342019	0.270273	0.22853	0.278921	0.790943	0.544219	0.341562	0.587329	0.48313	0.370306	0.330719	0.317801	0.839176	0.223414
POS_4584	Diethanolamine	0.305809	0.362327	1.17872	0.601544	0.185643	1.31364	0.134487	0.542286	0.0765902	0.0844938	0.355564	0.0464048	0.0715048	0.17149	0.0523173	0.126845	0.113843	0.763322
POS_4616	Quinate	0.122774	0.120325	0.120042	0.115225	0.12914	0.133652	0.119088	0.16486	0.0919916	0.090373	0.0782849	0.0961224	0.051047	0.0671788	0.0586196	0.0819543	0.0807929	0.0991838
POS_4983	D-Glucose 6-phosphate	0.463053	0.469165	0.576262	0.473322	0.553958	0.494506	0.368978	0.451512	0.896695	0.864338	0.679365	1.0036	0.890105	0.587098	0.513453	0.522855	0.827343	0.466892
POS_5396	Inosine	2.88248	3.82556	5.68742	4.61639	3.19477	4.17956	4.28064	4.28269	2.16957	1.46106	2.35133	1.86037	2.48873	2.71561	3.70269	1.91288	2.25553	3.4077
POS_5452	5'-Deoxyadenosine	0.482088	0.556226	1.49274	1.76913	1.25755	0.612258	0.486267	0.540643	0.420214	0.399788	0.51921	0.333627	0.413158	0.397447	0.426996	0.416661	0.389236	0.441081
POS_5496	(-)-Medicarpin	0.0356344	0.042527	0.0817366	0.0590706	0.0313416	0.0587776	0.0482475	0.0438504	0.0182895	0.015125	0.0253058	0.0282984	0.0329249	0.0351085	0.0437827	0.0190034	0.0194111	0.0329196
POS_5498	Deoxyinosine	0.304929	0.307869	1.05558	0.72567	0.580718	0.378801	0.215751	0.33618	0.224628	0.232131	0.321422	0.190461	0.24826	0.302297	0.222969	0.288235	0.239462	0.238555
POS_5990	Duloxetine	0.328752	0.23129	0.445966	0.21517	0.288004	0.226551	0.339924	0.402464	0.111977	0.0996815	0.15529	0.102106	0.122249	0.140945	0.156419	0.337077	0.158405	0.0509914
POS_5993	D-Biotin	8.2641	12.0413	8.20259	6.52436	5.67051	6.91917	4.40435	6.6335	13.5089	10.7836	10.0232	10.1109	15.9841	13.6686	10.9532	6.20665	16.4843	7.23586
POS_6235	Eicosapentaenoic Acid	0.408576	0.455555	0.557956	0.300852	0.372492	0.406515	0.285847	0.478807	0.121648	0.22211	0.280447	0.205847	0.213752	0.147069	0.180307	0.329202	0.338106	0.290117
POS_6748	Stearidonic Acid	0.634892	0.589922	0.692336	0.464188	1.12434	1.05782	0.741463	0.68044	0.209847	0.308203	0.385876	0.274262	0.40641	0.340517	0.459308	0.384858	0.57976	0.291579
POS_6826	all cis-(6,9,12)-Linolenic acid	0.727128	0.675593	0.904874	0.553241	1.01081	0.984754	0.864327	0.734316	0.331249	0.435029	0.512508	0.42697	0.681435	0.516356	0.608356	0.536924	0.615883	0.491126
POS_6937	2'-O-methyladenosine	0.786609	0.844919	0.931155	1.65598	0.936547	0.898003	2.04737	1.22652	1.09664	0.729635	0.690608	0.630328	0.610347	0.301465	0.549236	0.665213	0.408072	0.448882
POS_7001	12-oxo-ETE	0.503995	0.480509	0.536028	0.24174	0.244148	0.333792	0.194343	0.466862	0.139385	0.230075	0.183848	0.120276	0.156941	0.174593	0.141129	0.301649	0.322971	0.245509
POS_7029	Ile-Asn	1.98017	1.41285	2.29536	1.73665	1.94982	2.16701	1.74934	1.88982	1.53236	1.31826	1.5558	1.49364	1.37136	1.69175	1.35859	1.43509	1.69583	1.80981
POS_7084	Xanthosine	0.212791	0.418057	0.724851	0.352827	0.197934	0.45229	0.341497	0.467368	0.17114	0.1253	0.240737	0.11868	0.105778	0.145111	0.0828401	0.284186	0.140212	0.62459
POS_7595	16-Hydroxypalmitic acid	0.69792	0.550118	0.758092	0.611962	1.18878	1.09643	0.965893	0.641476	0.2868	0.419329	0.435862	0.377907	0.361184	0.465579	0.481796	0.486433	0.616569	0.348575
POS_7686	Hydroxybupropion	0.14512	0.408532	0.0793916	0.120839	0.239471	0.195914	0.0820823	0.112062	0.0611372	0.0583923	0.102179	0.111462	0.0123946	0.055855	0.0468182	0.0684096	0.0862433	0.0468623
POS_7793	cis-9-Palmitoleic acid	0.387918	0.444162	0.492643	0.35563	0.316979	0.377159	0.232545	0.475277	0.18256	0.20153	0.0647468	0.129807	0.298287	0.204533	0.196258	0.329838	0.314283	0.273199
POS_8135	Equol	0.328131	0.306721	0.327745	0.367651	0.346196	0.294061	0.367893	0.345254	0.280157	0.23596	0.291316	0.230251	0.184599	0.149538	0.222458	0.27076	0.294269	0.185437
POS_8201	Benztropine	0.0639924	0.0627805	0.134442	0.0732144	0.0545075	0.0916333	0.0405697	0.074615	0.0380469	0.0211731	0.0424245	0.0362934	0.0324892	0.0368687	0.018732	0.051584	0.0400652	0.103432
POS_8286	Fluoxetine	0.170112	0.151774	0.306733	0.123582	0.159474	0.258579	0.153305	0.285178	0.0566585	0.117596	0.16604	0.164614	0.0655539	0.0724345	0.0901278	0.149285	0.111935	0.171346
POS_8374	(+)-alpha-Pinene	0.138833	0.127926	0.19135	0.203564	0.354036	0.270468	0.330357	0.155737	0.0757877	0.0851383	0.111342	0.114544	0.0414004	0.0830394	0.148223	0.110839	0.100269	0.0432447
POS_8847	Ethosuximide	0.0600543	0.0495632	0.105913	0.0299777	0.0524039	0.0845191	0.0801253	0.0939678	0.0354137	0.0293235	0.0627291	0.0329592	0.0412207	0.0243034	0.0243617	0.0511721	0.0536595	0.0483131
POS_8866	(+-)8,9-DHET	0.309248	0.283674	0.44258	0.238524	0.326799	0.533152	0.359573	0.332576	0.13893	0.187594	0.241492	0.154577	0.256224	0.248058	0.216462	0.25801	0.241477	0.276518
POS_9000	Linoleoyl ethanolamide	0.621148	0.668975	0.972559	0.379351	0.678669	0.883173	0.586703	0.766323	0.201715	0.253585	0.506329	0.25421	0.448999	0.331307	0.267386	0.332417	0.435327	0.61181
POS_9009	Uridine 5'-monophosphate (UMP)	1.53851	1.3395	1.61239	2.07037	1.78791	1.19683	2.14928	1.31451	1.77428	0.61702	0.711711	1.40809	0.627533	1.2184	0.870489	0.945666	0.984537	1.43455
POS_9025	D-Maltose	3.58276	6.82892	2.90371	4.92035	4.52413	5.9737	3.86815	2.11323	11.0873	11.6428	16.2127	12.7106	12.7311	11.8663	10.9467	13.2387	15.6423	5.74267
POS_9068	N-Glycolylneuraminic acid	0.673293	1.02898	0.549221	0.795091	0.782166	0.997821	0.65822	0.438293	1.67086	1.60847	2.43132	1.75754	1.82637	1.73128	1.64955	1.96905	2.37902	0.899524
POS_9069	Evodiamine	0.278098	0.336969	0.29079	0.358018	0.30206	0.253435	0.231024	0.271263	0.255153	0.189692	0.194861	0.227762	0.165513	0.168519	0.163472	0.179027	0.226412	0.260646
POS_9090	N-Oleoylethanolamine	0.896153	0.697207	0.90006	0.693951	0.618799	0.872522	0.716568	0.993899	0.424197	0.540525	0.834483	0.531249	0.574591	0.5459	0.497743	0.966086	0.488376	0.504062
POS_9859	5-Nitro-2-Phenylpropylaminobenzoic Acid [Nppb]	0.553107	0.612793	0.564333	0.810974	0.761346	0.689703	0.467293	0.626414	0.468327	0.416218	0.499923	0.629425	0.358997	0.452191	0.341652	0.42743	0.550719	0.538587
POS_10132	Corticosterone	0.369296	0.889974	0.674654	0.458007	0.715858	0.634429	0.669349	0.538633	0.35898	0.277644	0.227691	0.35918	0.307735	0.365938	0.409598	0.346411	0.124933	0.293323
POS_10194	Arachidonoyl ethanolamide	0.191013	0.188172	0.437535	0.141072	0.196978	0.276075	0.236585	0.261869	0.103487	0.105099	0.145916	0.109003	0.137508	0.0910716	0.101657	0.131704	0.159441	0.342989
POS_10540	2-Furoylglycine	0.0852039	0.0557759	0.0877992	0.0825915	0.0653093	0.0912892	0.112166	0.108357	0.0536834	0.0349303	0.0659438	0.0327432	0.0280034	0.0732399	0.0387574	0.0399868	0.0488476	0.134663
POS_10729	Phe-Gln	0.111522	0.116805	0.0906285	0.0910384	0.0768184	0.0602249	0.0436976	0.0889181	0.203793	0.101525	0.118675	0.131721	0.146228	0.0935587	0.128496	0.214106	0.18537	0.132878
POS_10735	Isomaltose	31.8804	43.5803	17.8455	19.2953	24.0805	27.1867	14.5754	17.7434	26.7982	46.8351	71.2423	34.286	47.3349	34.6954	46.4881	45.4995	75.084	21.1233
POS_11567	Riboflavin	1.32112	1.34173	2.17123	1.36682	1.48813	2.25884	1.55087	1.72495	0.904536	0.95505	1.39724	0.853775	0.772732	1.22278	0.84101	1.15124	1.34493	2.03726
POS_16312	Amlodipine	0.154503	0.144796	0.0648003	0.102123	0.14712	0.205881	0.135542	0.118256	0.110551	0.240733	0.465251	0.23531	0.202862	0.299237	0.123209	0.291868	0.370238	0.165279
POS_16369	Ala-Phe	0.166148	0.158555	0.181473	0.163829	0.170032	0.146994	0.163923	0.155996	0.148482	0.139172	0.161032	0.144431	0.120906	0.144616	0.112289	0.123345	0.143762	0.16845
POS_17558	Taurocholate	0.466841	0.393809	0.703595	0.369053	0.633753	0.593437	0.493843	0.528308	0.300817	0.338078	0.423927	0.40311	0.358842	0.352574	0.326058	0.481526	0.416874	0.422696
POS_18752	Maltotriose	17.1337	27.5794	12.9567	22.3479	21.9625	26.2336	18.6874	8.5094	48.6518	49.1738	65.9708	55.4343	53.5707	52.4768	46.8974	56.1496	66.7138	24.7884
POS_24862	Stachyose	0.457884	0.7552	0.388922	0.528192	0.660523	0.656686	0.49497	0.281497	1.46048	1.32595	1.45865	1.53122	1.51762	1.25978	1.23897	1.21678	1.67781	0.604653
POS_26544	D-(+)-Melibiose	0.537373	0.673236	0.135955	0.467041	0.399664	0.325367	0.334475	0.206048	0.684223	1.33824	2.23293	1.04966	1.2668	0.94581	1.36845	1.41263	2.40878	0.379146
POS_26728	Maltotetraose	0.681072	0.988991	0.6339	0.836945	0.858924	0.911327	0.69526	0.500832	1.46409	1.24557	1.50708	1.46728	1.47697	1.46582	1.20843	1.4014	1.58318	0.877708
POS_32447	Maltopentaose	0.216973	0.339954	0.174376	0.197449	0.232619	0.194826	0.167042	0.15497	0.511056	0.447692	0.423118	0.492176	0.549533	0.371728	0.43228	0.377733	0.383366	0.230172
