# Supplementary material for: Ganoderic acid A from Ganoderma lucidum protects against alcoholic liver injury through ameliorating the lipid metabolism and modulating the intestinal microbial composition
Source: Royal Society of Chemistry journal article supplement (doi:10.1039/d1fo03219d), 2022-01-01
Supplement: d1fo03219d3.xlsx [file d1fo03219d3.xlsx]

## Sheet: Sheet1
Supplementary Materials-4:
The relative abundance of significantly different metabolites between the Model and GAA-H groups by UPLC-QTOF/MS in ESI- mode [data calibrated by peak area of internal standard]
Metabolite ID	MS2 name	GAA-H_1	GAA-H_2	GAA-H_3	GAA-H_4	GAA-H_5	GAA-H_6	GAA-H_7	GAA-H_8	Model_1	Model_2	Model_3	Model_4	Model_5	Model_6	Model_7	Model_8	Model_9	Model_10
NEG_21044	Maltotriose	0.140826	0.213377	0.122157	0.192006	0.204961	0.219663	0.147372	0.0862117	0.396138	0.506405	0.509988	0.495189	0.437457	0.455884	0.447321	0.485703	0.541396	0.183878
NEG_9906	Cellobiose	0.129017	0.171703	0.102154	0.154785	0.169563	0.190685	0.120051	0.0726924	0.332901	0.386992	0.430503	0.390908	0.345283	0.352095	0.377832	0.391938	0.415896	0.149112
NEG_25259	Neohesperidin	0.00072753	0.00122543	0.000550572	0.00065084	0.00130071	0.000818177	0.000717032	0.000491289	0.00274351	0.00299034	0.0024316	0.00307118	0.00287685	0.002528	0.00275844	0.00200938	0.00233322	0.000694365
NEG_16440	S-(p-Azidophenacyl)glutathione	0.000496278	0.000542619	0.000493505	0.000473489	0.00050811	0.00066813	0.000553834	0.000454218	0.000719144	0.000948517	0.000887348	0.000803054	0.000648152	0.000647772	0.000871082	0.000833524	0.000730216	0.000577751
NEG_1792	D-Allose	0.00295652	0.00357066	0.00273298	0.00266261	0.00470242	0.0039005	0.00300753	0.00233815	0.00777833	0.00950803	0.00707252	0.00857194	0.00740144	0.00708612	0.00705433	0.00600523	0.00779971	0.00267822
NEG_1791	3-Hydorxy-3-methylglutaric acid	0.0105437	0.0135676	0.0109916	0.0108753	0.010268	0.012652	0.00754957	0.0119412	0.0133087	0.0210794	0.0198334	0.0185407	0.0175338	0.0171653	0.0156727	0.0191866	0.0193218	0.0112905
NEG_10844	Sinigrin	0.00535976	0.00467449	0.00658076	0.00461444	0.00440766	0.0064659	0.00498952	0.00599307	0.00303467	0.00331328	0.00420851	0.0032862	0.00287852	0.00285555	0.00275339	0.0039697	0.00347218	0.00527782
NEG_13442	Acetylcarnitine	0.024319	0.0212934	0.020295	0.0155473	0.0357022	0.0227096	0.0245086	0.0247668	0.0117544	0.0183838	0.0120596	0.0155937	0.00904031	0.0150532	0.0141879	0.0167518	0.0105338	0.0148538
NEG_3693	Pantothenate	0.91103	0.830597	1.13129	0.808237	0.875032	1.17313	0.765107	1.13526	0.34068	0.528664	0.65612	0.542782	0.502841	0.481334	0.385326	0.825523	0.572317	0.767999
NEG_4883	Bufexamac	0.00486432	0.00404493	0.00567848	0.0044374	0.00495077	0.00590381	0.00504873	0.00570011	0.00211031	0.00195147	0.00359339	0.00230933	0.0026006	0.00280448	0.00189866	0.00413301	0.00298914	0.00482706
NEG_3138	L-Iditol	0.00279563	0.0017483	0.00137731	0.00185984	0.00107181	0.00271025	0.00129609	0.00370445	0.00307472	0.00612525	0.00615725	0.00652578	0.00458352	0.00378934	0.00818101	0.0203383	0.00785077	0.00354599
NEG_6481	Stearidonic Acid	0.0579981	0.0480654	0.0660152	0.0892787	0.101416	0.0922957	0.0862959	0.0528042	0.0334548	0.0347311	0.047132	0.0309909	0.0487406	0.0542651	0.0525981	0.033581	0.0463335	0.0400024
NEG_1794	L-Sorbose	0.632364	0.778677	0.359752	0.562384	0.538262	0.590377	0.414739	0.351459	0.736487	0.976435	1.26972	1.02697	0.867586	0.917093	0.96002	1.2524	1.29185	0.529908
NEG_6033	Hexadecanedioic acid	0.0620631	0.0363488	0.0525582	0.0458853	0.0552775	0.0557026	0.0606329	0.0503199	0.0324987	0.0464146	0.0433367	0.0298127	0.0237644	0.0345531	0.0340681	0.033379	0.032963	0.0389774
NEG_10905	5'-Phosphoribosyl-5-amino-4-imidazolecarboxamide	0.000732692	0.000560121	0.000911003	0.00066794	0.000627209	0.00082347	0.000540465	0.000806846	0.000373697	0.000455119	0.000646603	0.000483007	0.000346767	0.000520466	0.000319796	0.000396508	0.000384497	0.000566305
NEG_28930	Flavin adenine dinucleotide (FAD)	0.000875873	0.00116558	0.000674771	0.000945212	0.00142654	0.00107787	0.000918562	0.000605995	0.00186597	0.0021654	0.00235869	0.00134607	0.00140665	0.00163542	0.00179427	0.00177235	0.00201649	0.00095538
NEG_2328	myo-Inositol	0.327808	0.391943	0.222247	0.303626	0.293742	0.32251	0.241581	0.218739	0.36721	0.458704	0.589838	0.495086	0.425054	0.440609	0.452876	0.578048	0.609379	0.288843
NEG_7486	9(S)-HODE	0.540074	0.39224	0.524095	0.391101	0.647486	0.665307	0.489173	0.438747	0.24248	0.288122	0.293654	0.266501	0.344755	0.277508	0.290721	0.402821	0.301838	0.528166
NEG_8938	2'-Deoxycytidine 5'-monophosphate (dCMP)	0.00148947	0.00153494	0.00144368	0.00177929	0.00200939	0.00236108	0.00172625	0.00187853	0.00095083	0.000685649	0.000882064	0.000867507	0.000823205	0.00126468	0.000738951	0.00144227	0.00144588	0.00164873
NEG_2794	D-galacturonic acid	0.0962498	0.0925049	0.0895048	0.098605	0.0995111	0.101498	0.10444	0.0996368	0.0792129	0.0627118	0.0668215	0.0655156	0.0569263	0.0763474	0.0511006	0.0765946	0.0877078	0.101469
NEG_409	D(-)-beta-hydroxy butyric acid	0.0382463	0.0204333	0.0293729	0.0387996	0.0657438	0.0601317	0.0530871	0.0388019	0.0203189	0.0220162	0.0207115	0.0191388	0.0155057	0.0258595	0.0227039	0.0362029	0.0185301	0.0246881
NEG_6587	all cis-(6,9,12)-Linolenic acid	0.778018	0.818094	0.819024	1.04706	1.3608	1.24567	1.06684	0.814179	0.529139	0.621395	0.790755	0.4918	0.759345	0.821152	0.771806	0.515662	0.74265	0.56162
NEG_3496	Tridecanoic acid (Tridecylic acid)	0.00763475	0.00658099	0.00905934	0.0123282	0.0111467	0.0120246	0.00993869	0.0120247	0.0100948	0.022107	0.0258936	0.0196673	0.0159586	0.017347	0.0152774	0.0127104	0.0127148	0.0187625
NEG_9374	Adrenic Acid	0.713216	0.770952	1.20801	0.55813	1.67405	1.5481	0.63729	0.948648	0.261791	0.467095	0.459027	0.436149	0.638703	0.465512	0.506982	0.504674	0.765036	0.481577
NEG_12768	Glafenine	0.0012232	0.00130995	0.00149098	0.00121408	0.0017062	0.00115766	0.00122059	0.0012426	0.000891814	0.000720947	0.00121698	0.00106813	0.000949055	0.00103367	0.00110773	0.00110563	0.000987295	0.00105289
NEG_677	2-Methyl-3-hydroxybutyric acid	0.00743319	0.00533202	0.00717742	0.00626732	0.00903445	0.00970048	0.00633889	0.00863773	0.00254606	0.00265559	0.00503779	0.0035199	0.00272896	0.00525118	0.00541233	0.00432823	0.00620505	0.00625835
NEG_22084	ADP-glucose	0.00594615	0.00614567	0.00425158	0.00532415	0.00552031	0.00491161	0.0068985	0.00705213	0.00370357	0.00325118	0.00364495	0.00377459	0.00316209	0.00544393	0.00346601	0.0053553	0.00386333	0.0050186
NEG_10462	Acetylvalerenolic acid	0.0494905	0.0407442	0.0735702	0.0270588	0.0305645	0.0747708	0.0422378	0.069358	0.0100319	0.0114419	0.0238885	0.00840622	0.00777846	0.0124565	0.0103716	0.0288361	0.0124875	0.0846977
NEG_2345	Acamprosate	0.0519406	0.0637968	0.159404	0.0969217	0.107822	0.179911	0.278945	0.105228	0.0349832	0.0274565	0.0517089	0.0388695	0.0477056	0.0750265	0.0403541	0.0676472	0.0611822	0.0800629
NEG_4601	L-Cystine	0.0101611	0.0100132	0.0222823	0.0154029	0.0088542	0.0145112	0.00947271	0.0125177	0.00705904	0.00296859	0.00351986	0.00701744	0.00377842	0.00641914	0.00645922	0.00914125	0.00278401	0.0137364
NEG_2498	3-Phosphoserine	0.000465715	0.000557675	0.00054059	0.000651099	0.000526562	0.00049688	0.000687931	0.000426141	0.000758845	0.000793341	0.000796946	0.00093714	0.000994293	0.000790034	0.00054014	0.00115874	0.00073939	0.000537443
NEG_34608	Oleoyl-CoA	0.000388714	0.000295715	0.000328258	0.000345174	0.000292035	0.000432409	0.000545354	0.000381007	0.000388418	0.000367485	0.000209354	0.000182621	0.000135299	0.000160919	0.000125232	0.000175574	0.000288731	0.000191631
NEG_2861	Galactonic acid	1.75571	1.43533	2.59456	2.36226	2.23967	2.05637	2.09895	2.12699	1.47501	1.13875	1.45813	1.38356	1.07027	1.52181	1.31731	1.56355	1.74789	2.19134
NEG_14481	Adenosine 3',5'-diphosphate (PAP)	0.065947	0.0554345	0.0541871	0.11261	0.0798828	0.0709778	0.136645	0.0617923	0.0411524	0.0483138	0.0637451	0.049106	0.0425665	0.0403228	0.046329	0.0483421	0.0634802	0.0507045
NEG_34557	Linoleoyl-CoA	0.000413227	0.000299913	0.000386393	0.000358333	0.000368939	0.000493895	0.000532633	0.000335187	0.000380652	0.000237262	0.000225623	0.000158392	0.000194543	0.000230406	0.000138639	0.000118309	0.000265342	0.000428829
NEG_15095	Amygdalin	0.00104838	0.000966308	0.00124632	0.000822396	0.000905243	0.00132157	0.00130015	0.00155362	0.000562282	0.000536575	0.000665072	0.000617659	0.000401	0.00079893	0.000666717	0.00113832	0.00072619	0.00115407
NEG_9940	Nicolsamide	0.000572532	0.0014719	0.000540821	0.000768623	0.0013207	0.00101063	0.000562927	0.000392851	0.00098377	0.00151354	0.00168332	0.00170312	0.00208272	0.00149616	0.00136758	0.00159335	0.00155373	0.000752655
NEG_4797	L-Fucose-1-phosphate	0.00223068	0.00225928	0.00312959	0.00258393	0.00218691	0.00438976	0.00270334	0.00309463	0.00220842	0.00162728	0.00234529	0.0016645	0.00140113	0.00166531	0.00128578	0.00194462	0.00168782	0.00300087
NEG_9763	D-Fructose 1,6-bisphosphate	0.000570322	0.00395361	0.000956532	0.00110603	0.00118022	0.000926415	0.000254466	0.000359197	0.00103112	0.0022946	0.00447026	0.0022845	0.00452075	0.00148512	0.0053048	0.00440402	0.00308354	0.00141205
NEG_15409	CDP-ethanolamine	0.0296344	0.0280086	0.0380108	0.0232546	0.048889	0.0330287	0.0285795	0.0290102	0.0236715	0.0195095	0.0264859	0.0190882	0.0152794	0.0195404	0.0154686	0.0194593	0.0196396	0.0386235
NEG_2206	Pyruvate	0.0267401	0.00919902	0.0160018	0.0203529	0.0297437	0.0117499	0.0131645	0.0147653	0.0109566	0.0101185	0.00789042	0.00873102	0.00782034	0.0139474	0.0105659	0.0105045	0.00937194	0.0129211
NEG_15189	Folate	0.00048286	0.000286862	0.000470772	0.000400288	0.0004417	0.000570948	0.000570157	0.000727007	0.000377757	0.000285803	0.000342481	0.00052006	0.000368058	0.000264895	0.000271498	0.000285988	0.000304917	0.00030477
NEG_1670	Pelargonic acid	0.0452008	0.0345034	0.0617161	0.0551761	0.0515103	0.0438112	0.0509592	0.0489424	0.108351	0.050818	0.0580528	0.0616468	0.0573207	0.105658	0.0549543	0.0660411	0.100038	0.079894
NEG_11783	Riboflavin	0.00520655	0.00545351	0.00754413	0.00593828	0.00727395	0.00794953	0.00718847	0.00643735	0.00438056	0.00470642	0.00546984	0.00450476	0.00329845	0.00492643	0.00413188	0.00501428	0.00499488	0.00780587
NEG_7640	Phytosphingosine	0.0134752	0.00506773	0.00955158	0.00763585	0.0177141	0.029702	0.0139144	0.021409	0.00185579	0.00807323	0.01297	0.00172587	0.00481225	0.00634751	0.00414073	0.0101021	0.00488318	0.00140736
NEG_4614	D-Fructose	0.245871	0.281082	0.199226	0.284322	0.249952	0.232541	0.152607	0.219387	0.423541	0.315217	0.34958	0.289725	0.280815	0.523654	0.358927	0.293913	0.534413	0.203016
NEG_10806	5(S)-HETE	0.000417292	0.000409567	0.00046721	0.000571007	0.000389214	0.000456224	0.00020036	0.000407335	0.000228313	0.000171178	0.000255713	0.00033045	9.92576e-05	0.000244412	0.00022391	0.00031542	0.000160855	0.000404959
NEG_670	Methylmalonic acid	0.0763148	0.0840069	0.102778	0.0671306	0.119594	0.117164	0.0907174	0.07645	0.0741433	0.0772587	0.0628472	0.0739345	0.0606123	0.0611421	0.0824957	0.0759073	0.0725945	0.0577379
NEG_2928	5,6,7,8-tetrahydro-2-Naphthoic Acid	0.0259511	0.0217376	0.0384339	0.0349833	0.0334293	0.0308251	0.0339031	0.0335639	0.0230659	0.0217217	0.0214995	0.0209938	0.0173453	0.0244624	0.0212751	0.0240071	0.0302562	0.0334123
NEG_5930	Phenethyl Caffeiate	0.108001	0.115877	0.135205	0.0967886	0.143738	0.175216	0.12588	0.15784	0.0866104	0.103927	0.121046	0.0786888	0.0522848	0.0847142	0.075834	0.0900086	0.0877992	0.146176
NEG_10733	1-methylguanosine	0.00106689	0.00151482	0.00204338	0.00119288	0.000847947	0.00188611	0.000795327	0.001487	0.00054623	0.000804032	0.000753158	0.00082577	0.000176245	0.000751136	0.00054351	0.000758331	0.000826415	0.00117987
NEG_4385	Indoxyl sulfate	0.00974087	0.0063248	0.0135058	0.00820858	0.00723807	0.0117136	0.0101904	0.0130676	0.00663174	0.00509634	0.00611647	0.00535033	0.00373071	0.00484005	0.00532115	0.0113918	0.0055216	0.0103733
NEG_1690	Isovalerylglycine	0.113196	0.0743521	0.196268	0.127451	0.0824535	0.10115	0.0951205	0.110918	0.0729081	0.0460877	0.0385631	0.0689419	0.0405217	0.0608916	0.0938661	0.092882	0.0213126	0.104241
NEG_19861	Amentoflavone	0.00110875	0.00100847	0.00108294	0.00100675	0.00109301	0.00105534	0.0010034	0.00106634	0.000892307	0.00074125	0.000808257	0.000834711	0.00114114	0.00104737	0.000851224	0.000823117	0.00073761	0.00106713
NEG_12286	Cytidine 5'-diphosphate (CDP)	0.00165795	0.00196685	0.0023824	0.00182726	0.00259302	0.002436	0.00256328	0.00259428	0.0017864	0.00191908	0.00210618	0.00195545	0.00142774	0.00167382	0.00192536	0.00183733	0.0017386	0.00176587
NEG_36277	UDP-D-Galactose	0.00396779	0.00282336	0.0042314	0.00190493	0.00299225	0.00434036	0.00277272	0.00431003	0.00208807	0.00187677	0.00206379	0.00212976	0.00147242	0.00190543	0.00208024	0.00262838	0.00211576	0.00424164
NEG_1790	D-Tagatose	0.0142353	0.0200851	0.0169041	0.016247	0.012964	0.0176576	0.00960185	0.0129822	0.0149117	0.0236516	0.0262284	0.0234766	0.0209109	0.0194569	0.020896	0.0219264	0.0206812	0.0136507
NEG_7852	Evodiamine	0.000773733	0.000632248	0.00162625	0.00138118	0.00172235	0.00110334	0.00072542	0.000548391	0.000486341	0.000163514	0.000714275	0.000490194	0.00023504	0.000634026	0.000497445	0.000578707	0.000637281	0.000887858
NEG_1189	O-Phosphoethanolamine	0.0131969	0.0133645	0.0236559	0.014941	0.0196513	0.0200166	0.0128041	0.0178993	0.0121215	0.013581	0.0142458	0.013715	0.0106161	0.0113166	0.011447	0.0128668	0.0147537	0.0146531
NEG_2519	Undecanoic Acid	0.00710196	0.00810974	0.00625994	0.00779024	0.00746635	0.0113663	0.00635121	0.0132242	0.00960246	0.00983562	0.0126325	0.0240168	0.0401052	0.0123832	0.0128062	0.0198752	0.00804484	0.0145601
NEG_4480	Biopterin	0.00680213	0.00649982	0.0094738	0.00578478	0.00620738	0.00716335	0.00434149	0.00627202	0.00460033	0.00459644	0.00508004	0.00380963	0.00337637	0.00408153	0.00396987	0.00608825	0.00468282	0.00752283
NEG_7800	Eicosapentaenoic Acid	0.00452057	0.00271366	0.00391108	0.0057822	0.00838272	0.00592301	0.00919091	0.00472514	0.00230454	0.0041793	0.00409318	0.00359507	0.00211463	0.00450913	0.00342238	0.00413677	0.00257581	0.00302337
NEG_4257	Sedoheptulose	0.000949168	0.00107503	0.000402946	0.000731042	0.000468994	0.000461097	0.000429914	0.000649855	0.000920157	0.000908369	0.000827517	0.00135384	0.00103802	0.00087227	0.00115951	0.00159681	0.00111978	0.000498435
NEG_2807	2'-Deoxy-D-ribose	0.0123648	0.0133503	0.00348589	0.01249	0.00612634	0.00357923	0.0041293	0.00630175	0.0169078	0.0197144	0.0221307	0.0217992	0.0143462	0.0166676	0.0166199	0.0185228	0.0261512	0.00287335
NEG_4023	Deoxycytidine	0.00890849	0.00809866	0.0113746	0.00752393	0.00692223	0.00774511	0.00652272	0.0107539	0.00756393	0.00666098	0.00808371	0.00637791	0.00628122	0.0060667	0.00646677	0.00511231	0.00676325	0.00731536
NEG_80	Glycine	0.0267486	0.0337899	0.0551217	0.0346427	0.0284231	0.0368144	0.0281249	0.0339741	0.0239189	0.0241844	0.0269354	0.0238212	0.0193457	0.0252305	0.024091	0.0282496	0.0262317	0.0377351
NEG_749	Nicotinamide	0.0817956	0.0874387	0.0705813	0.0845212	0.0897489	0.0875151	0.0754684	0.0827062	0.07059	0.0794874	0.0792719	0.0597704	0.0694964	0.0781419	0.073973	0.0769523	0.0734528	0.0731616
